# Supplementary material
Source: MDPI journal article supplement (https://www.mdpi.com/2073-4344/11/11/1278)
Supplement: s1 [file s1]

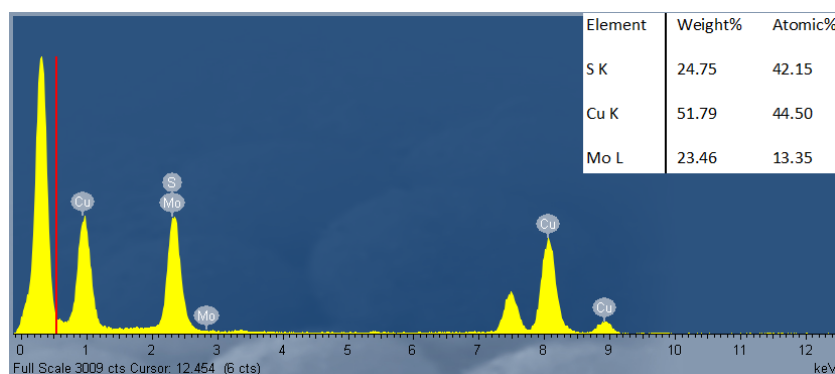

**Figure S1.** EDS spectrum of Cu<sub>2</sub>S-MoS<sub>2</sub>/rGO composites.

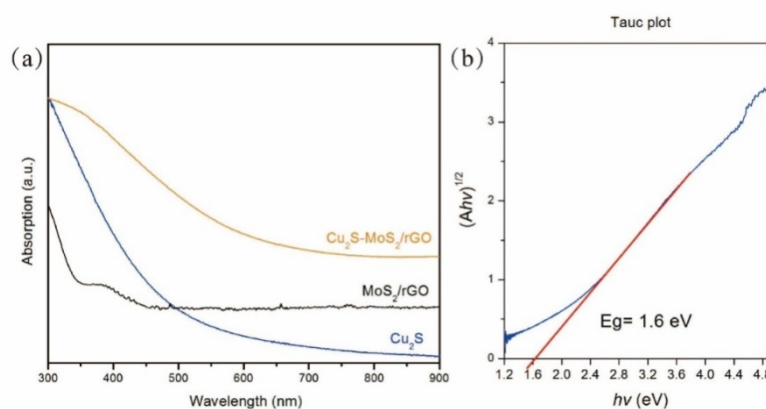

**Figure S2.** (a) UV-Vis spectra of Cu<sub>2</sub>S-MoS<sub>2</sub>/rGO, MoS<sub>2</sub>/rGO, and Cu<sub>2</sub>S; (b) the band gap calculation of Cu<sub>2</sub>S by using Tauc plot.

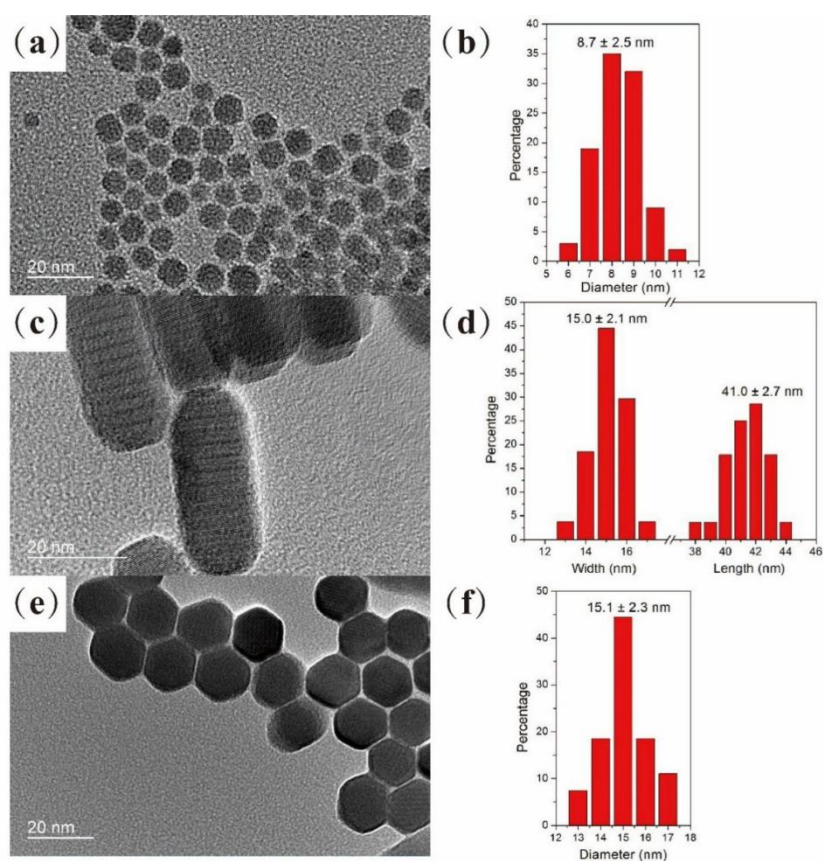

**Figure S3.** Typical TEM images of (a) Cu<sub>2</sub>S nanoparticles, (c) nanorods, (e) nanoplates and their corresponding size distribution histograms (b, d, f).

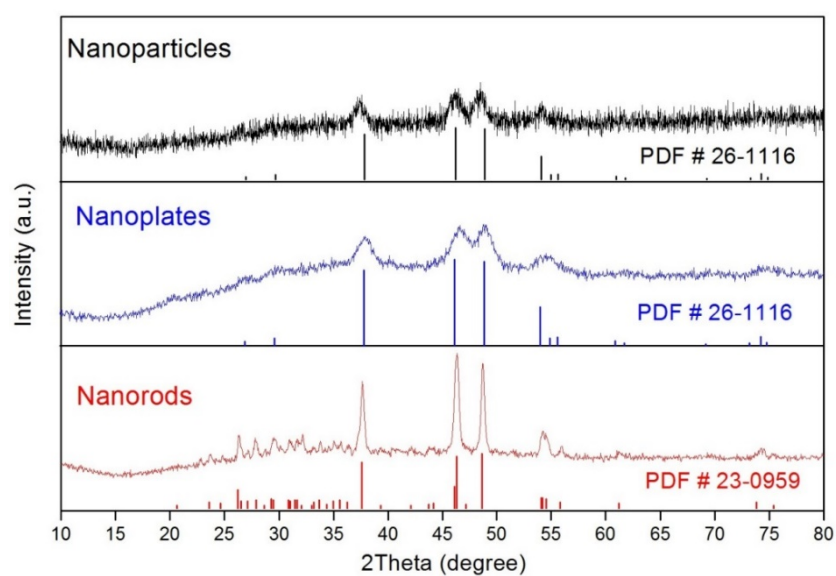

**Figure S4.** Powder XRD patterns of as-synthesized Cu<sub>2</sub>S nanoparticles, nanoplates, and nanorods.

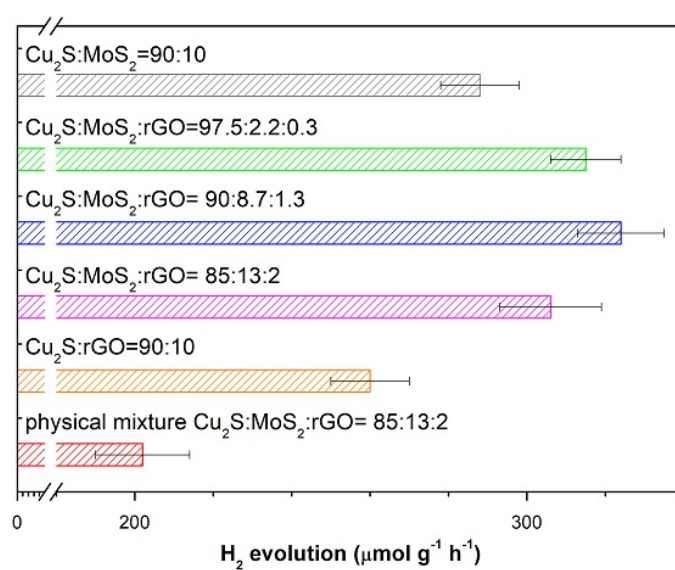

**Figure S5.** H<sub>2</sub> generation from various Cu<sub>2</sub>S-MoS<sub>2</sub>/rGO composites with different ratios compared to their physical mixture.
